# Supplementary material for: Species‐specific susceptibility to cannabis‐induced convulsions
Source: PubMed Central journal article supplement — Br J Pharmacol. 2018 Mar 25;176(10):1506–23. doi: 10.1111/bph.14165 (PMC6487554; doi:10.1111/bph.14165), 2018-03-25
Supplement: BPH-176-1506-s001.pdf [file BPH-176-1506-s001.pdf]

## Supporting Information

### Supporting Information Table 1

| Rank | Low dose (1.08/1.00 THC/CBD mg kg <sup>-1</sup> ) |                |                        |                | High dose (40.5/37.5 THC/CBD mg kg <sup>-1</sup> ) |                |                            |                |
|------|---------------------------------------------------|----------------|------------------------|----------------|----------------------------------------------------|----------------|----------------------------|----------------|
|      | Acute                                             | Median % (IQR) | Persistent             | Median % (IQR) | Acute                                              | Median % (IQR) | Persistent                 | Median % (IQR) |
| 7    |                                                   |                |                        |                |                                                    |                | Mouth rubbing              | 0 (0-0)        |
| 8    |                                                   |                | Hunched posture        | 0 (0-0)        |                                                    |                | <b>Chewing</b>             | 0 (0-0)        |
| 9    |                                                   |                | Exophthalmos           | 0 (0-0)        |                                                    |                | <b>Twitch</b>              | 0 (0-0)        |
| 10   |                                                   |                | Fasciculations         | 0 (0-0)        |                                                    |                | <b>Tremor</b>              | 0 (0-0)        |
| 11   | Piloerection                                      | 0 (0-0)        | Piloerection           | 0 (0-0)        |                                                    |                | Behavioural arrest         | 0 (0-0)        |
| 12   | Digit biting                                      | 0 (0-0)        | Digit biting           | 0 (0-0)        |                                                    |                | <b>Forelimb flickering</b> | 0 (0-0)        |
| 13   | <b>Twitch</b>                                     | 0 (0-0)        | Mouth rubbing          | 0 (0-0)        | Digit biting                                       | 0 (0-0)        | <b>Forelimb clonus</b>     | 0 (0-0)        |
| 14   | <b>Tremor</b>                                     | 0 (0-0)        | <b>Chewing</b>         | 0 (0-0)        | <b>Tremor</b>                                      | 0 (0-0)        | <b>Popping</b>             | 0 (0-0)        |
| 15   | Behavioural arrest                                | 0 (0-0)        | <b>Twitch</b>          | 0 (0-0)        | <b>Forelimb clonus</b>                             | 0 (0-0)        | Fasciculations             | 0 (0-0)        |
| 16   | <b>Forelimb clonus</b>                            | 0 (0-0)        | <b>Tremor</b>          | 0 (0-0)        | <b>Popping</b>                                     | 0 (0-0)        | Writhing                   | 0 (0-0)        |
| 17   | <b>Popping</b>                                    | 0 (0-0)        | Behavioural arrest     | 0 (0-0)        | Fasciculations                                     | 0 (0-0)        | Licking                    | 0 (0-0)        |
| 18   | Fasciculations                                    | 0 (0-0)        | <b>Forelimb clonus</b> | 0 (0-0)        | Writhing                                           | 0 (0-0)        | Salivation                 | 0 (0-0)        |
| 19   | Hunched posture                                   | 0 (0-0)        | <b>Popping</b>         | 0 (0-0)        | Licking                                            | 0 (0-0)        | Hind limb extension        | 0 (0-0)        |
| 20   | Licking                                           | 0 (0-0)        | Licking                | 0 (0-0)        | Hind limb extension                                | 0 (0-0)        | Head searching             | 0 (0-0)        |
| 21   | Exophthalmos                                      | 0 (0-0)        | Salivation             | 0 (0-0)        | Head searching                                     | 0 (0-0)        | <b>Myoclonic jerk</b>      | 0 (0-0)        |
| 22   | Hind limb extension                               | 0 (0-0)        | Hind limb extension    | 0 (0-0)        | <b>Myoclonic jerk</b>                              | 0 (0-0)        | <b>Convulsion</b>          | 0 (0-0)        |
| 23   | Head searching                                    | 0 (0-0)        | Head searching         | 0 (0-0)        | <b>Convulsion</b>                                  | 0 (0-0)        | Hunched posture            | 0 (0-0)        |
| 24   | <b>Myoclonic jerk</b>                             | 0 (0-0)        | <b>Myoclonic jerk</b>  | 0 (0-0)        | Hunched posture                                    | 0 (0-0)        | Exophthalmos               | 0 (0-0)        |
| 25   | <b>Convulsion</b>                                 | 0 (0-0)        | <b>Convulsion</b>      | 0 (0-0)        | Exophthalmos                                       | 0 (0-0)        | Digit biting               | 0 (0-0)        |

**Supporting Information Table 2**

| Behaviour                  | All behaviours |                  |                |                  |
|----------------------------|----------------|------------------|----------------|------------------|
|                            | F1             |                  | F2             |                  |
|                            | Squared cosine | Contribution (%) | Squared cosine | Contribution (%) |
| Piloerection               | <b>0.704</b>   | 3.205            | 0.282          | 13.661           |
| Ptosis                     | <b>0.731</b>   | 8.931            | 0.250          | 32.564           |
| Digit biting               | <b>0.324</b>   | 0.057            | 0.031          | 0.059            |
| Increased grooming         | <b>0.704</b>   | 2.813            | 0.091          | 3.861            |
| Increased scratching       | <b>0.510</b>   | 1.229            | 0.449          | 11.532           |
| <b>Wet dog shakes</b>      | <b>0.846</b>   | 3.210            | 0.152          | 6.148            |
| Mouth rubbing              | <b>0.957</b>   | 38.458           | 0.043          | 18.400           |
| <b>Chewing</b>             | <b>0.990</b>   | 3.395            | 0.001          | 0.030            |
| <b>Twitch</b>              | 0.375          | 0.040            | <b>0.623</b>   | 0.703            |
| <b>Tremor</b>              | <b>0.200</b>   | 0.004            | 0.161          | 0.037            |
| Behavioural arrest         | <b>0.680</b>   | 0.137            | 0.279          | 0.598            |
| <b>Forelimb flickering</b> | <b>0.878</b>   | 3.703            | 0.118          | 5.318            |
| <b>Forelimb paddling</b>   | <b>0.999</b>   | 32.490           | 0.000          | 0.000            |
| <b>Forelimb clonus</b>     | <b>0.674</b>   | 0.051            | 0.215          | 0.173            |
| <b>Popping</b>             | <b>0.569</b>   | 0.002            | 0.282          | 0.008            |
| Fasciculations             | <b>0.391</b>   | 0.000            | 0.107          | 0.000            |
| Writhing                   | 0.222          | 0.036            | <b>0.653</b>   | 1.140            |
| Licking                    | <b>0.676</b>   | 0.000            | 0.058          | 0.000            |
| Salivation                 | <b>0.791</b>   | 2.236            | 0.190          | 5.702            |
| Hind limb extension        | <b>0.627</b>   | 0.002            | 0.371          | 0.012            |
| Head searching             | 0.032          | 0.000            | <b>0.456</b>   | 0.002            |
| <b>Myoclonic jerk</b>      | 0.082          | 0.000            | <b>0.748</b>   | 0.001            |
| <b>Convulsion</b>          | 0.040          | 0.000            | <b>0.725</b>   | 0.049            |
| Hunched posture            | <b>0.535</b>   | 0.000            | 0.428          | 0.000            |
| Exophthalmos               | <b>0.535</b>   | 0.000            | 0.428          | 0.000            |
| Piloerection               | <b>0.704</b>   | 3.205            | 0.282          | 13.661           |
| <b>Factor scores</b>       | <b>F1</b>      |                  | <b>F2</b>      |                  |
| <b>Observations</b>        |                |                  |                |                  |
| Low dose/persistent        | -57.6          |                  | -2.4           |                  |
| Low dose/acute             | 38.7           |                  | -26.6          |                  |
| High dose/persistent       | -52.2          |                  | 9.5            |                  |
| High dose/acute            | 71.1           |                  | 19.5           |                  |

**Supporting Information Table 3**

| <b>Animal ID</b> | <b>Dose group</b> | <b>Treatment day</b> | <b>During treatment or observation period</b> | <b>Motor convulsion</b> | <b>EEG record obtained</b> | <b>Epileptiform event present in EEG</b> | <b>Epileptiform event duration (s)</b> |
|------------------|-------------------|----------------------|-----------------------------------------------|-------------------------|----------------------------|------------------------------------------|----------------------------------------|
| <b>6</b>         | Low               | 64                   | No                                            | No                      | Yes                        | Yes                                      | 28                                     |
| <b>13</b>        | High              | 46*                  | Yes                                           | Yes                     | Yes                        | Yes                                      | 95                                     |
|                  | High              | 46*                  | Yes                                           | Yes                     | Yes                        | Yes                                      | 27                                     |
|                  | High              | 46*                  | Yes                                           | Yes                     | Yes                        | Yes                                      | 22                                     |
|                  | High              | 58                   | Yes                                           | Yes                     | Yes                        | Yes                                      | 50                                     |
|                  | High              | 61                   | Yes                                           | Yes                     | No                         | N/A                                      | N/A                                    |
|                  | High              | 61                   | Yes                                           | Yes                     | No                         | N/A                                      | N/A                                    |
| <b>15</b>        | High              | 61                   | Yes                                           | Yes                     | No                         | N/A                                      | N/A                                    |
|                  | High              | 36                   | No                                            | No                      | Yes                        | Yes                                      | 16                                     |
|                  | High              | 55                   | No                                            | Yes                     | No                         | N/A                                      | N/A                                    |
|                  | High              | 62*                  | No                                            | Yes                     | Yes                        | Yes                                      | 65                                     |
| <b>16</b>        | High              | 62*                  | No                                            | Yes                     | Yes                        | Yes                                      | 44                                     |
|                  | High              | 21                   | Yes                                           | Yes                     | Yes                        | Yes                                      | 74                                     |
|                  | High              | 36                   | No                                            | No                      | Yes                        | Yes                                      | 23                                     |
| 17               | High              | 44                   | Yes                                           | Yes                     | Yes                        | Yes                                      | 115                                    |
|                  | High              | 39*                  | Yes                                           | Yes                     | Yes                        | Yes                                      | 104                                    |
|                  | High              | 39*                  | Yes                                           | Yes                     | Yes                        | Yes                                      | 16                                     |
|                  | High              | 39*                  | Yes                                           | Yes                     | Yes                        | Yes                                      | 37                                     |
|                  | High              | 69                   | No                                            | Yes                     | Yes                        | Yes                                      | 57                                     |
|                  | High              | 71                   | No                                            | Yes                     | Yes                        | Yes                                      | 114                                    |
| 19               | High              | 76                   | No                                            | Yes                     | No                         | N/A                                      | N/A                                    |
|                  | High              | 47                   | No                                            | Yes                     | No                         | N/A                                      | N/A                                    |
|                  | High              | 50                   | Yes                                           | Yes                     | No                         | N/A                                      | N/A                                    |
|                  | High              | 58                   | No                                            | Yes                     | No                         | N/A                                      | N/A                                    |
| <b>20</b>        | High              | 69                   | Yes                                           | Yes                     | Yes                        | Yes                                      | 87                                     |
|                  | High              | 63                   | No                                            | No                      | Yes                        | Yes                                      | N/A**                                  |
| <b>23</b>        | High              | 61                   | Yes                                           | No                      | No                         | N/A                                      | N/A                                    |
|                  | High              | 90                   | Yes                                           | Yes                     | Yes                        | Yes                                      | N/A**                                  |
| <b>24</b>        | High              | 91                   | Yes                                           | Yes                     | No                         | N/A                                      | N/A                                    |

## Supporting Information Table Legends

### Supporting Information Table 1

Incidence of behaviours in rats (n=10 per group) observed immediately after (10 min; ‘acute’) or ~23 hours after (‘persistent’) daily oral administration of low dose (1.08 mg kg<sup>-1</sup> Δ<sup>9</sup>-THC + 1 mg kg<sup>-1</sup> CBD) or high dose (40.5 mg kg<sup>-1</sup> Δ<sup>9</sup>-THC + 37.5 mg kg<sup>-1</sup> CBD) cannabis extract for 13 weeks that exhibited a median and IQR of zero. Behavioural events conventionally associated with generalised seizures in rodents are highlighted in bold.

### Supporting Information Table 2

Table showing squared cosine and percentage contribution of each measured behaviour following variance-covariance principal component analysis applied to all behaviours recorded in low dose (1.08 mg kg<sup>-1</sup> Δ<sup>9</sup>-THC + 1 mg kg<sup>-1</sup> CBD) and high dose (40.5 mg kg<sup>-1</sup> Δ<sup>9</sup>-THC + 37.5 mg kg<sup>-1</sup> CBD) cannabis extract treated animals. Behaviours highlighted in bold show those conventionally associated with primary generalised seizures in rodents (see also: **Figures 1 & 2**). Squared cosine values shown in bold highlight the principal component in which the value exhibited its highest value. Table also shows factor values for each observation for the first two principal components (**F1** and **F2**).

### Supporting Information Table 3

Incidence of all convulsive motor events and/or epileptiform events exhibited in rats treated with low dose (1.08 mg kg<sup>-1</sup> Δ<sup>9</sup>-THC plus 1 mg kg<sup>-1</sup> CBD) or high dose (40.5 mg kg<sup>-1</sup> Δ<sup>9</sup>-THC plus 37.5 mg kg<sup>-1</sup> CBD) cannabis extract for 13 weeks. Note that in some case, accompanying EEG recordings (see Figure 4) showed (\*) multiple, discrete, epileptiform events during a single motor convulsion and (\*\*) animal handling or severity of motor convulsion that prevented acquisition of valid EEG data.

## **Supporting Information Methods**

### **Acquisition and processing of EEG data**

EEG data were acquired via the implants and wirelessly transmitted to PhysioTel receivers (DSI) connected via a Matrix MX2 interface (DSI) to a PC for storage until offline analysis. Data were sampled at 500 Hz. Epileptiform activity in EEG was detected using an automated seizure detection algorithm implemented in Neuroscore (DSI) where perturbations of >5x standard deviations of signal amplitude from pre-treatment baseline per animal were manually inspected and assessed. Mean epileptiform event duration was calculated from recorded EEG events that were not contaminated by handling-related artefacts. Prior to spectrographic analysis, EEG data which included all detected epileptiform events were exported from Neuroscore as per animal European Data Format (EDF) files, high pass filtered (1 Hz cutoff) using EDF Browser (<http://www.teuniz.net/edfbrowser/>) before import into Matlab (The Mathworks, Natick, MA, USA), where each recording was converted to a format suitable for import to Neuroexplorer 4.0 (Nex Technologies, Madison, AL, USA) and OriginPro 8.6 (OriginLab, Northampton, MA, USA). Spectrograms were constructed (1-20 Hz; 2048 values; 320 temporal shifts of 0.5 s) and normalised to the sum of spectrum values as the mean squared value of the whole signal within the frequency range specified. Power spectral density (PSD; 1-50 Hz; 256 values) was normalised to percentage of total PSD of the signal. Spectrograms and PSD plots were smoothed using a 3-point boxcar filter. Representative traces of epileptiform events were constructed in OriginPro from high pass filtered, continuous data.

### **Preparation and analysis of bioanalytes**

Samples, negative controls and calibration standards (provided by GW Research Ltd) were prepared for UPLC-MS/MS by mixing 100 µl sample, standard or control with 100 µl 1% Tween80 in dH<sub>2</sub>O in a 96-well plate before vortex mixing (60 s; 1000 rpm) and subsequent addition of 20 µl dehydrated acetonitrile to all blank samples and 20 µl internal standard working solution to all other wells. Resulting solutions were vortex mixed (30 s; 1200 rpm) before 200 µl ASTED conditioning solution (30 g trichloroacetic acid, 24.5 g Trizma ® Base tris and 0.05 g sodium azide in 200 ml UPLC water) was added before vortex mixing again (30 s; 1200 rpm), followed by addition of 200 µl dH<sub>2</sub>O and vortex mixing (30 s; 1200 rpm). Samples were then loaded onto a solid phase extraction plate (Waters Oasis HLB) before being washed twice with 1 ml

dH<sub>2</sub>O and then washed twice with 1 ml methanol:water (20:80<sup>v/v</sup>). Samples were then dried under full flow for 1 min before being washed twice with 1 ml hexane and subsequent re-drying under full flow for 30 s. Samples were eluted into a 1 ml collection plate using two volumes (400 µl) methanol and evaporated at 30°C under N<sub>2</sub>. Samples were then reconstituted in 100 µl 1% Tween80 in dH<sub>2</sub>O:methanol (60:40<sup>v/v</sup>), vortex mixed (30 s; 1200 rpm), centrifuged (5 min; 2600 g) and inject onto an Acquity Binary Solvent Manager UPLC-MS/MS system for analysis. A UPLC flow rate of 0.6 ml/min with a run time of 6.8 min at 65°C that used mobile phases comprising 0.1% ammonia in methanol and 5 mM aqueous ammonium formate (pH 9) was used and was connected to an Applied Biosystems API5000 mass spectrometer with a heated nebuliser at 500°C (5 amps) and the following parameters used: gas pressure: 40 psi; curtain gas pressure: 35 psi; collision gas pressure: 7 psi; probe position; 5 mm/5 mm. Cannabinoid and metabolite concentrations in samples were determined by comparison to standard curves.

## **Radioligand Binding**

### **Membrane preparation**

Cerebellar tissue was pooled according to dose group and treatment time. After sacrifice, cerebellae from male mice, rats and chickens were rapidly removed and flash frozen in liquid nitrogen and stored at -80°C until use. Male beagle and human cerebellae were supplied, already flash frozen. Irrespective of tissue type, membranes were prepared and used as described hereafter. Tissue was suspended in a membrane buffer containing Tris-HCl 50 mM, MgCl<sub>2</sub> 5 mM, EDTA 2mM and 0.5 mg ml<sup>-1</sup> fatty acid-free BSA and complete protease inhibitor (pH 7.4) and subsequently homogenised using an Ultra-Turrax blender. Homogenates were centrifuged at 1200 g for 10 min and supernatants decanted. The resulting pellets were homogenised and centrifugation repeated. Pooled supernatants were then centrifuged at 39,000 g for 60 min in a high-speed centrifuge and supernatants discarded. Remaining pellets were re-suspended in membrane buffer and protein content determined by Lowry assay (Lowry, 1951).

### **Saturation binding**

All drug stocks and membrane preparations were diluted in assay buffer (20 mM HEPES, 1 mM EDTA, 1 mM EGTA, 0.5%<sup>w/v</sup> fatty acid-free BSA, pH 7.4) and stored on ice prior to use. Assay tubes contained a

final volume of 1ml with [<sup>3</sup>H]SR141716A at final concentrations of (nM): 0.05, 0.1, 0.2, 0.5, 1, 2, 5, 10 or cold SR141716A at 100 μM to determine non-specific binding. Assays were initiated by addition of 30 μg membrane protein before incubation for 3 h at 25°C and terminated by rapid filtration through Whatman GF/C filters using a Brandell cell harvester. Unbound radioactivity was removed by four washes with 3 ml ice-cold PBS (0.14 M NaCl, 3 mM KCl, 1.5 mM KH<sub>2</sub>PO<sub>4</sub>, 5 mM Na<sub>2</sub>HPO<sub>4</sub>; pH 7.4). Filters were soaked in 2 ml scintillation fluid overnight and radioactivity quantified by liquid scintillation spectrometry (Wallace 1414).

### **[<sup>35</sup>S]-GTPγS binding**

Assays were carried out in assay buffer containing (in mM) HEPES 20, MgCl<sub>2</sub> 3, NaCl 60, EGTA 1 and 0.5 mg ml<sup>-1</sup> fatty acid free BSA; pH 7.4. Stock solutions of drugs and membrane preparations were diluted in assay buffer immediately before use and stored on ice prior to incubation. Assay tubes contained a final volume of 1 ml and guanosine 5'-diphosphate (GDP) at a final concentration of 10 μM, together with drugs at the desired final concentration, vehicle at an equivalent concentration, or additional assay buffer (when determining basal binding). Assays were initiated by addition of 10 μg membrane protein, pre-incubated for 30 min at 30°C prior to addition of [<sup>35</sup>S]-GTPγS to a final concentration of 0.1 nM and terminated after a further 30 min incubation at 30°C by rapid filtration (Whatman GF/C filters) using a Brandell cell harvester and three washes with ice-cold phosphate buffered saline to remove unbound radioactivity. Filters were incubated overnight in 2 ml scintillation fluid, and radioactivity quantified by liquid scintillation spectrometry. [<sup>35</sup>S]-GTPγS binding was expressed as percentage increase in radioactivity (measured as dpm) in the presence of drugs relative to basal levels of binding. Basal binding was defined as radioactivity measured in conditions of no agonist stimulation in the presence of 10 μM GDP and determined via a 10 pM-100 μM GDP dependency curve in triplicate on four separate occasions for each membrane preparation using 0.1 nM [<sup>35</sup>S]-GTPγS.

Lowry OH, Rosebrough NJ, Farr AL, Randall RJ (1951). Protein Measurement with the folin phenol reagent. *J. Biol. Chem* 193:265-275.
